# Supplementary material for: A new quinoline-based fluorescent-colorimetric chemosensor for sensitive and selective “on–off” detection of Pb 2+ ions
Source: Royal Society of Chemistry journal article supplement (doi:10.1039/d4ra08193e), 2025-01-01
Supplement: d4ra08193e1.pdf [file d4ra08193e1.pdf]

## A new quinoline-based fluorescent-colorimetric sensitive and selective chemosensor for "On-Off" Pb<sup>2+</sup> ion detection

Vanshika Sharma<sup>a</sup>, Srishti Dutta<sup>a</sup>, Devanand Sahu<sup>a</sup>, Abhilash Pandey<sup>a</sup>,  
Dishen Kumar<sup>a</sup>, Sanchita Das<sup>b</sup> and Goutam Kumar Patra<sup>a\*</sup>

<sup>a</sup>Department of Chemistry, Guru Ghasidas Vishwavidyalaya, Bilaspur, C.G, India

<sup>b</sup>Department of Chemistry, National Institute of Technology, Rourkela, Odisha, India

### Experimental

#### General information

##### 2.9 Competition with other metal ions

After dissolving **L** (2.47 mg, 0.01 mmol) in the solvent mixture (10 mL) that was previously indicated, 30 μL of the mixture was used to dilute it to 3 mL, resulting in a final concentration of 10 μM. Ten millilitres of triple-distilled water were used to dissolve them, together with M(NO<sub>3</sub>)<sub>x</sub> (0.1 mmol) and Pb(NO<sub>3</sub>)<sub>2</sub> (33.1, 0.1 mmol). To obtain ten equivalents of metal ions, three millilitres of receptor **L** (10 μM) solution were combined with thirty microlitres of each metal solution (10 mM). Next, to create 10 equivalents, 30 μL of Pb<sup>2+</sup> solution (10 mM) was added to the mixture of each metal ion and **L**. Room temperature UV-Vis and fluorescence spectra were obtained following a brief mixing period.

##### 2.10 Computational details

The program package GAUSSIAN-09 Revision C.01 was used for all calculations.<sup>1</sup> The hybrid exchange correlation functional, which uses the gradient-corrected DFT level and the Coulomb-attenuating technique B3LYP, was applied to fully optimise the Ligand's (**L**) gas phase geometries in the singlet ground state without requiring any symmetry.<sup>2</sup> It was found that the basis set 6-31++G was appropriate for all of the molecules. The form of the **L**+Pb<sup>2+</sup> complex (**1**) was optimised with LanL2DZ basis sets.

##### 2.11 Molecular Electrostatic Potential

The molecular electrostatic potential at any given place surrounding a molecule can be described by the complete charge distribution of the molecule and its relationship to the dipole moments. It offers insight into electron density that is useful in determining electrophilic reactivity, nucleophilic reactivity, and hydrogen-bonding interactions.<sup>3,4</sup>

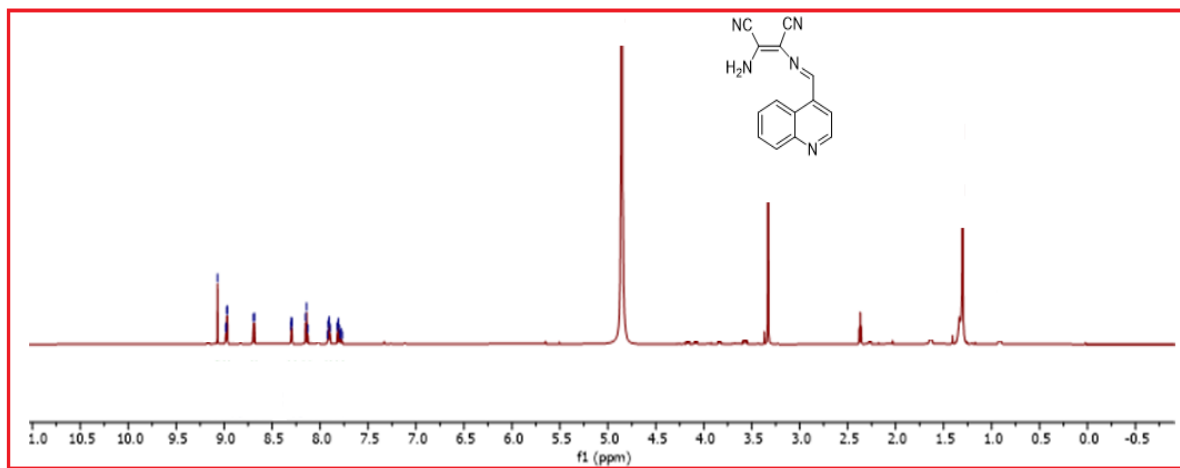

**Fig. S1.** <sup>1</sup>H NMR spectra of L in CD<sub>3</sub>OD.

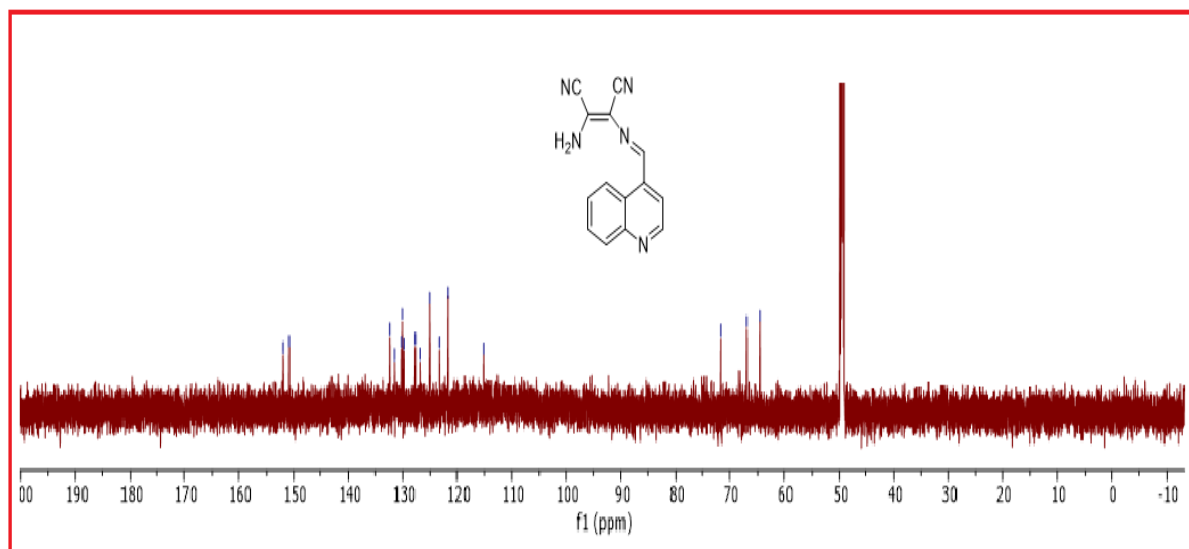

**Fig. S2.** <sup>13</sup>C NMR spectra of L in CD<sub>3</sub>OD.

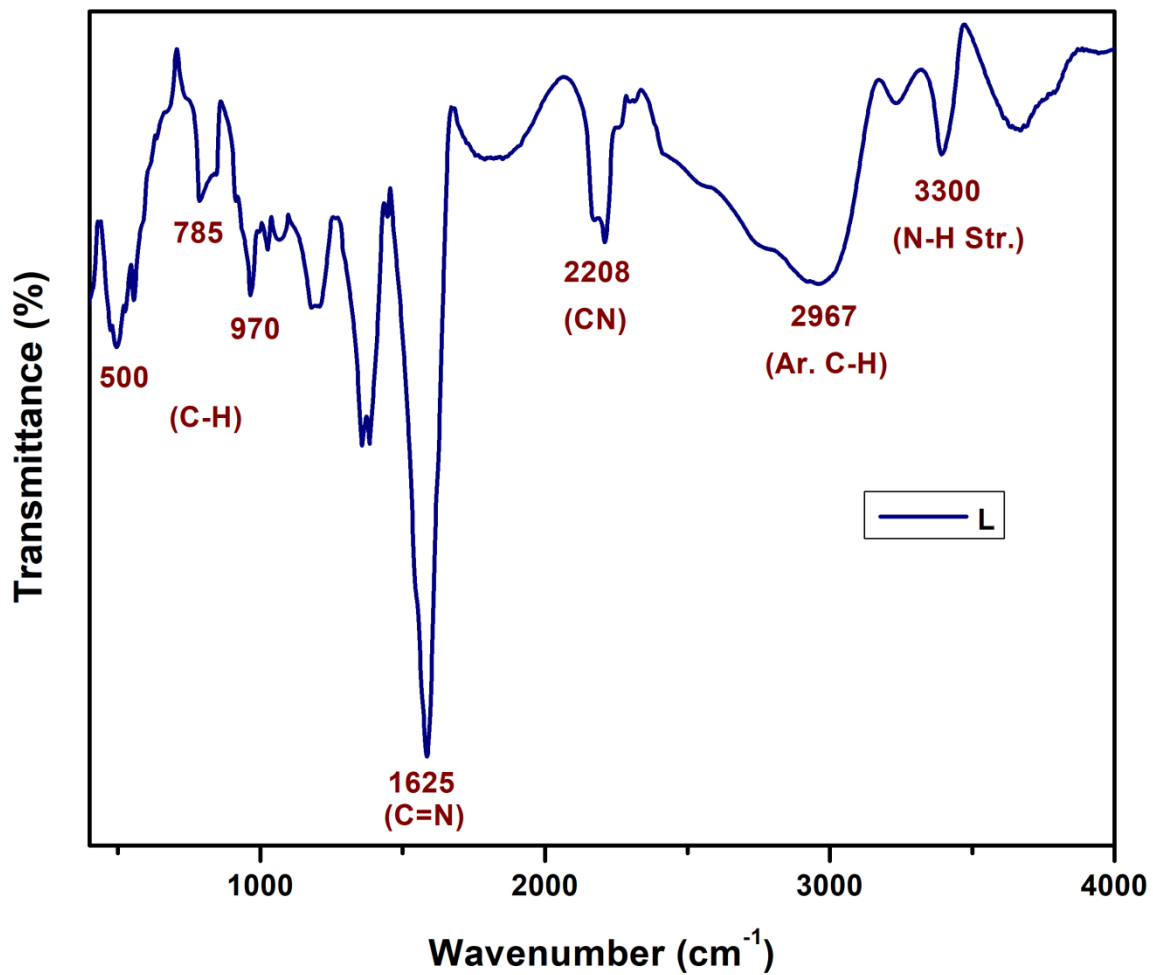

Fig. S3. FTIR spectra of L

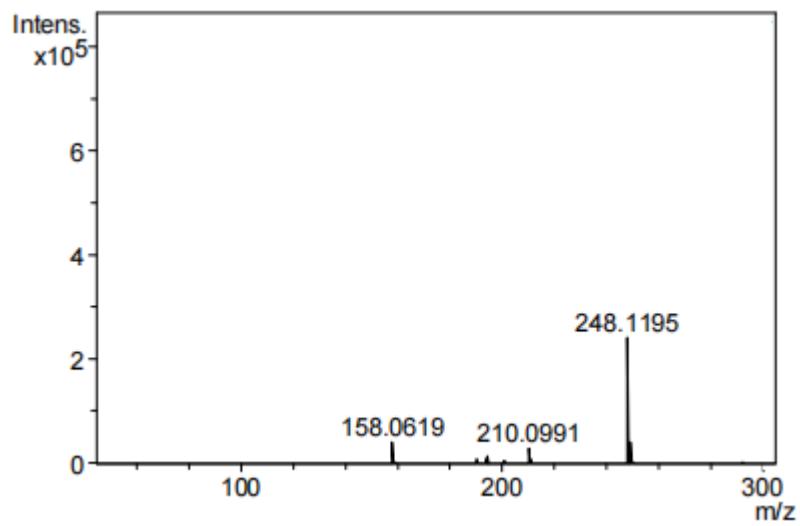

Fig. S4. ESI-mass spectra of L

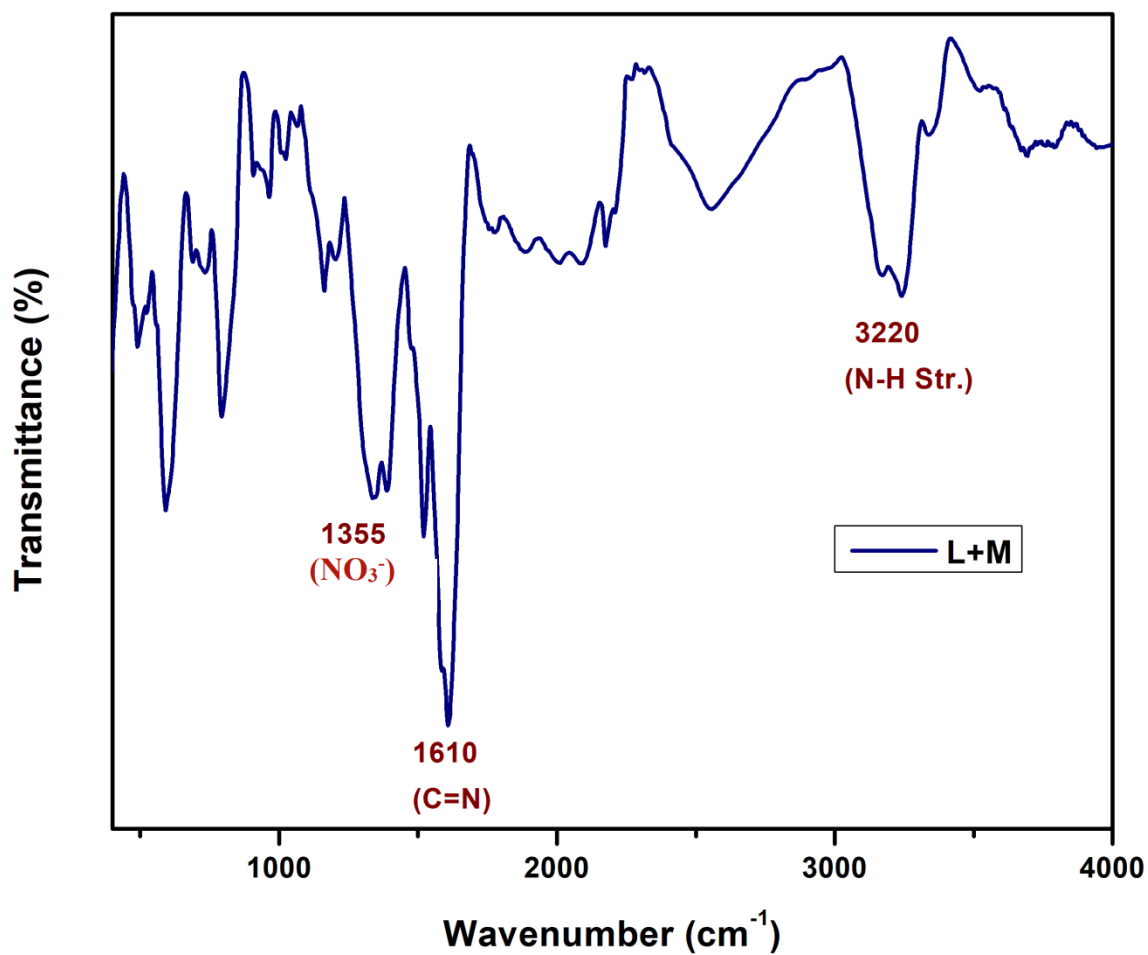

Fig. S5. FTIR spectra of L-Pb<sup>2+</sup> (1)

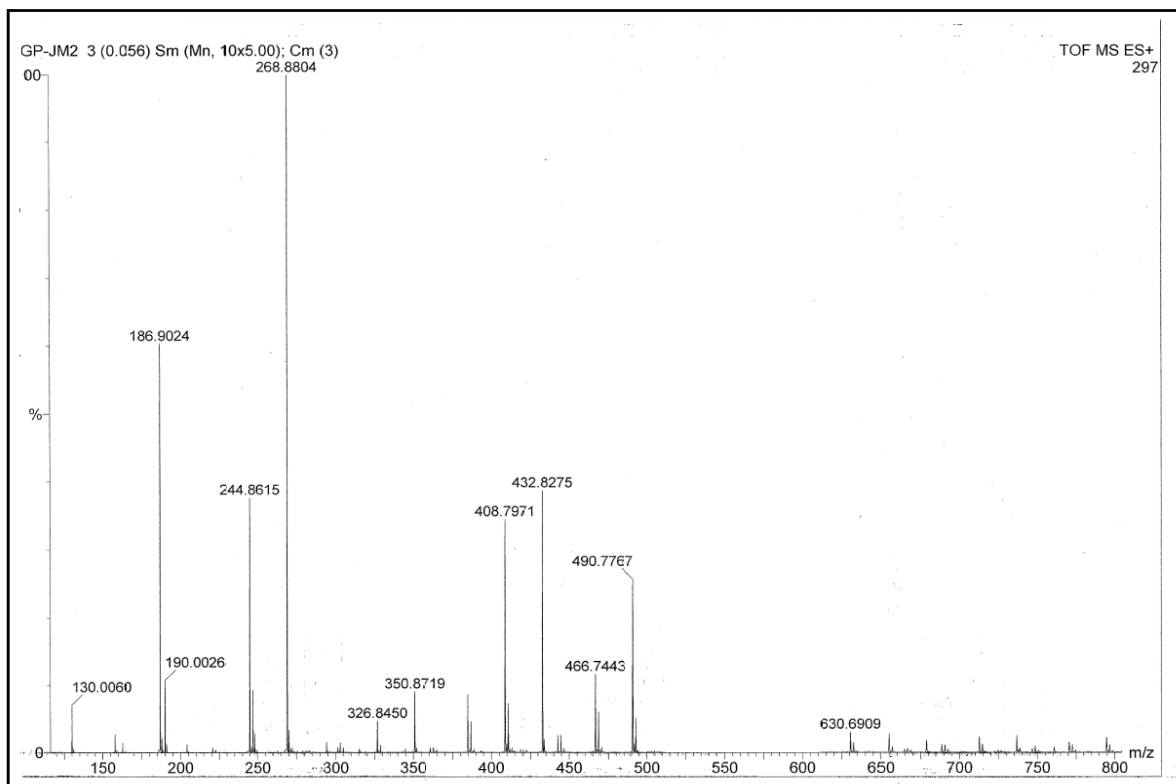

Fig. S6. ESI-mass spectra of L-Pb<sup>2+</sup> (1)

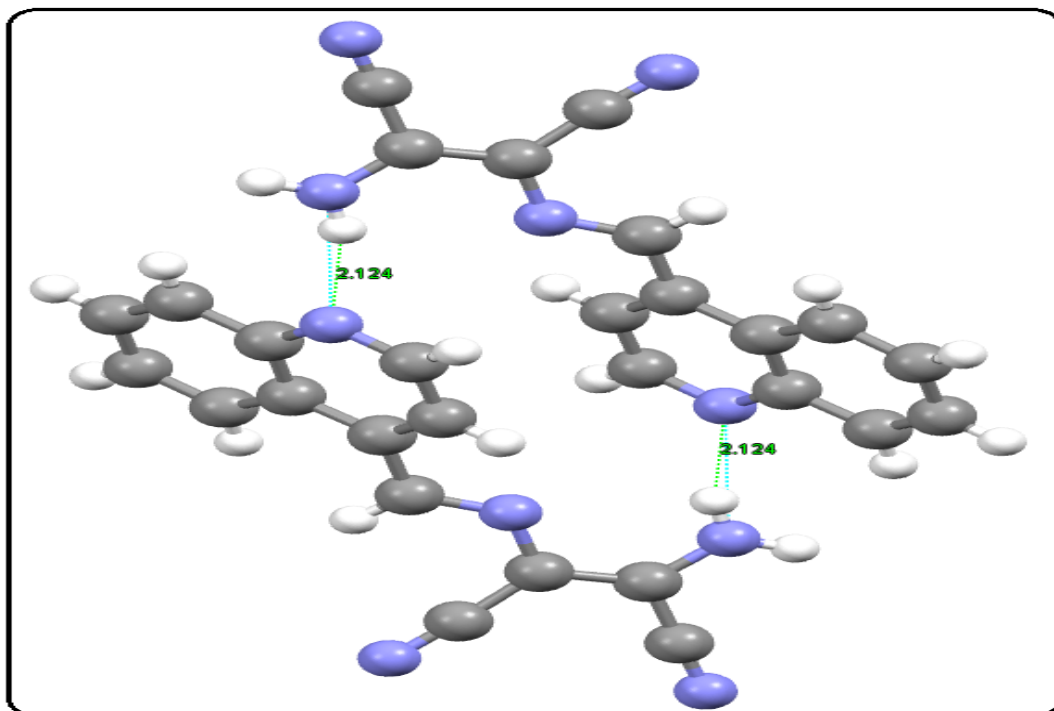

Fig. S7. Dimeric view of hydrogen-bonded L.

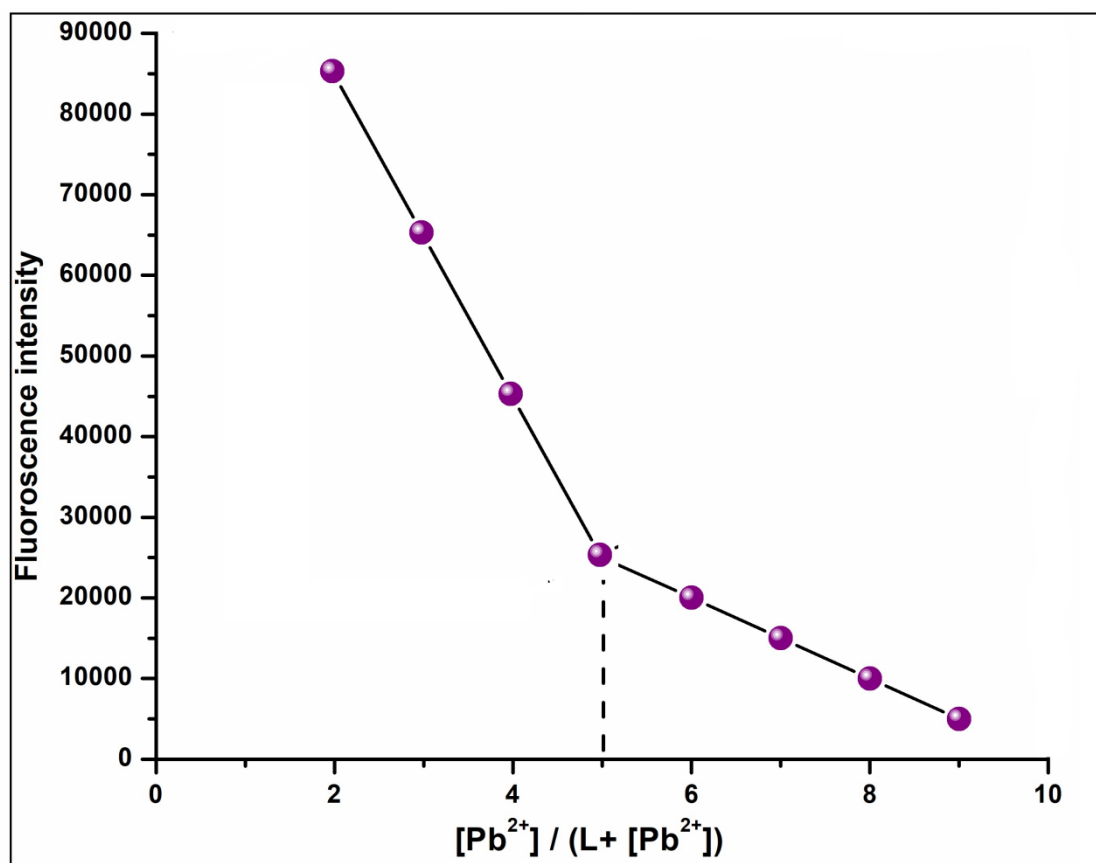

Fig. S8. Job's plot of L.

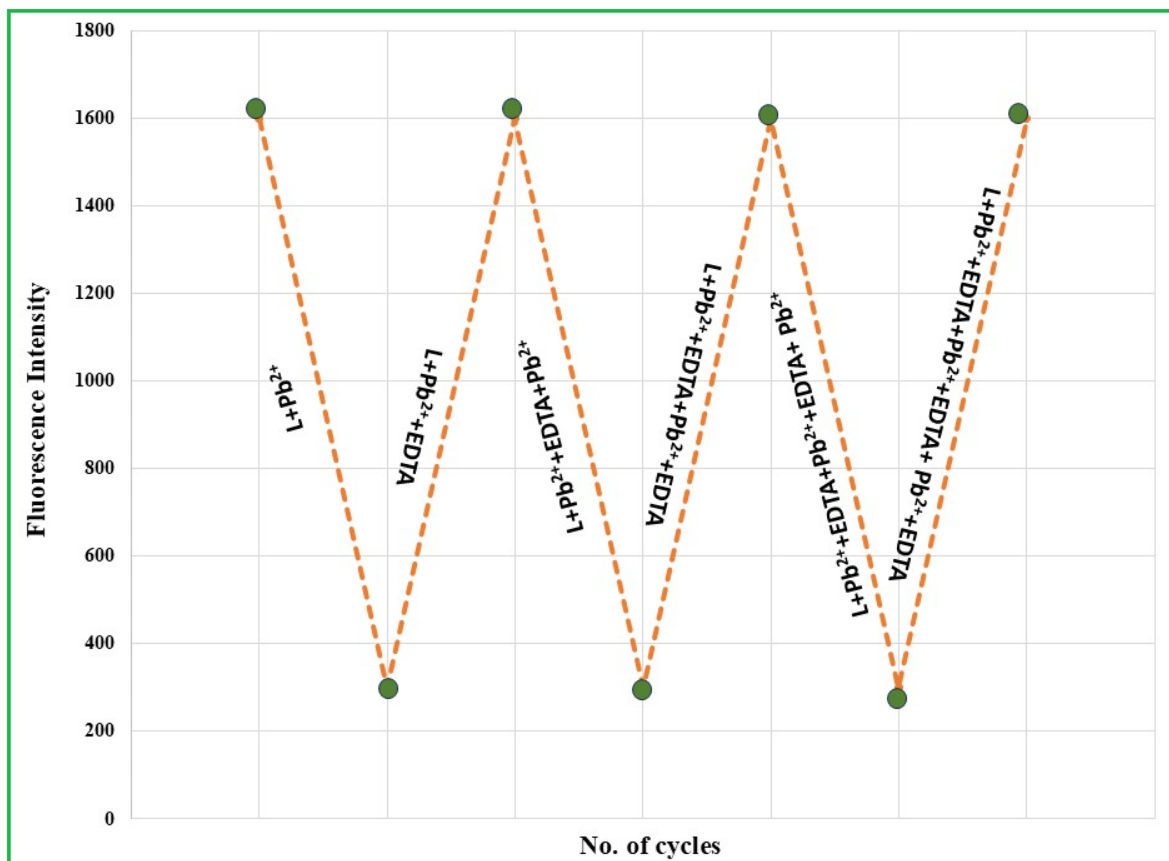

Fig. S9. Reversible cycle of L.

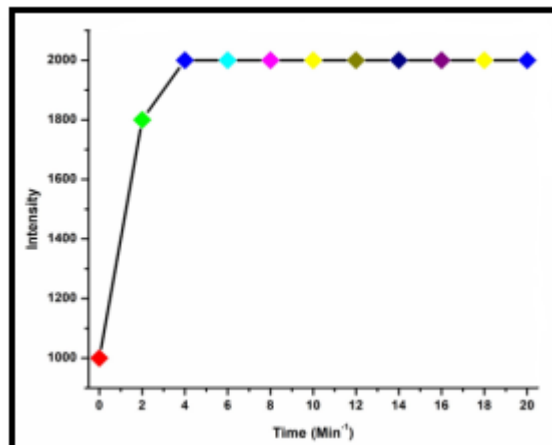

Fig. S10. Time-dependant fluorescence plot of L

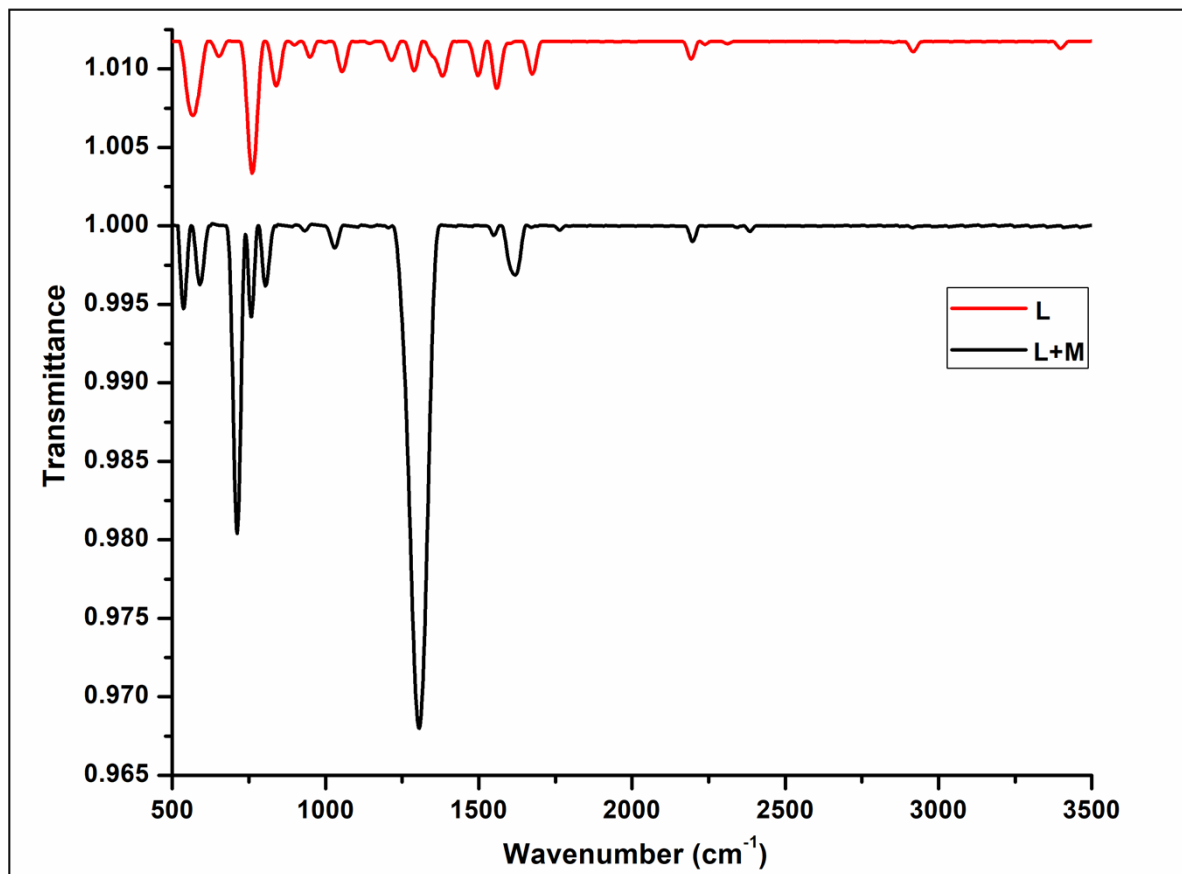

Fig. S11. Stag plot of the FTIR spectra of L and L-Pb<sup>2+</sup>

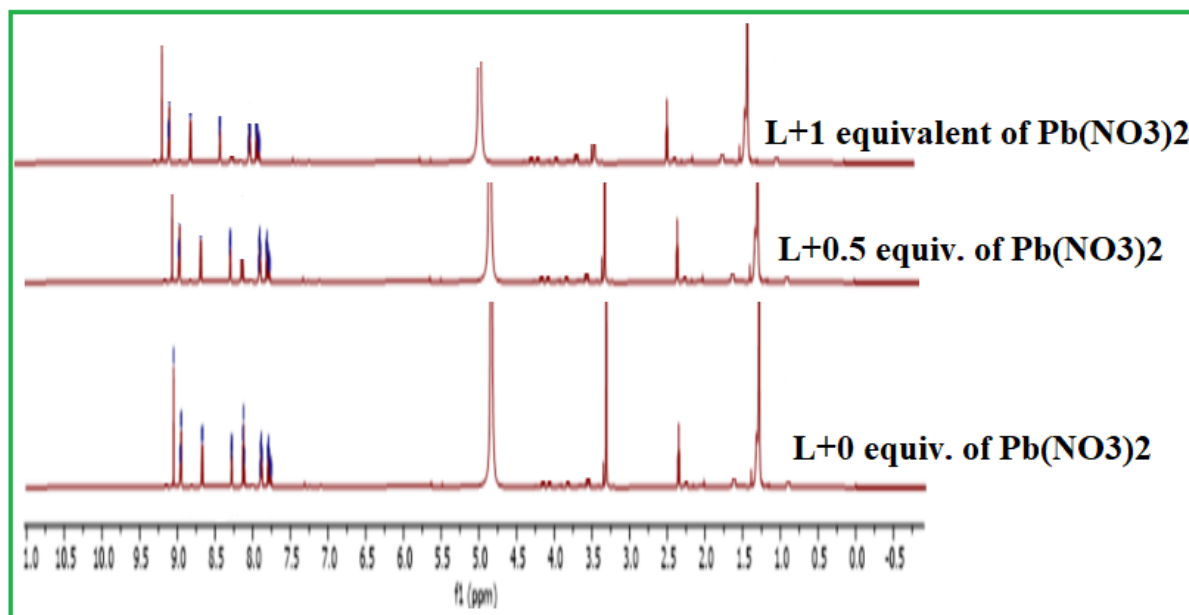

Fig. S12. The <sup>1</sup>H-NMR titration of L with Pb<sup>2+</sup>

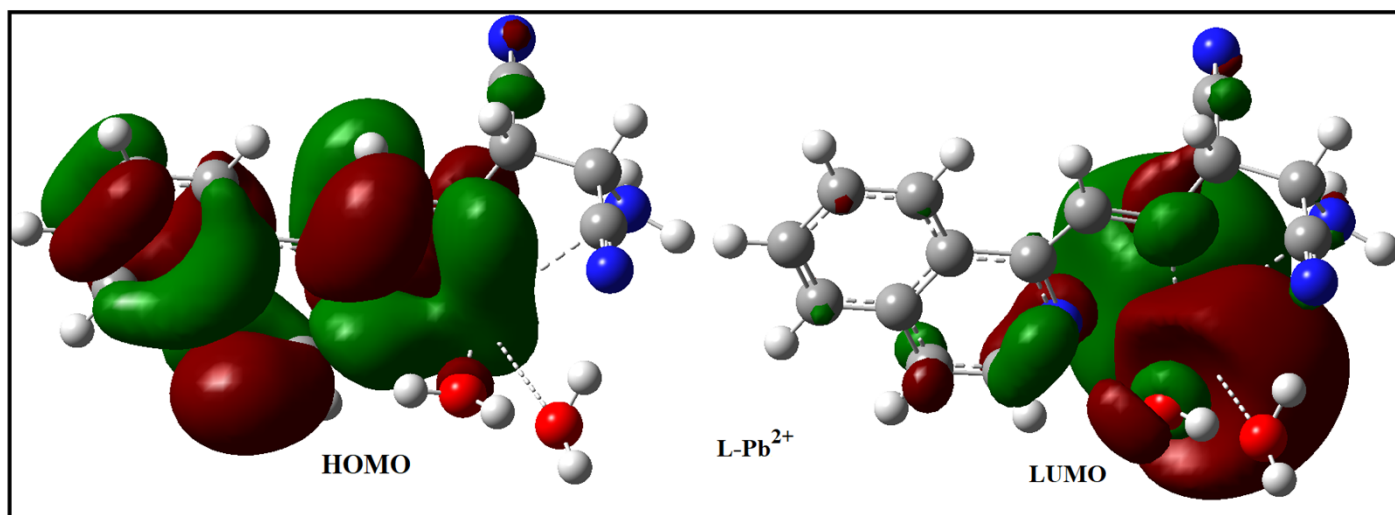

Fig. 13. The contour diagrams of HOMO and LUMO of L-Pb<sup>2+</sup>

Table S1. Bond Lengths for L

| Atom | Atom | Length/Å    | Atom | Atom | Length/Å    |
|------|------|-------------|------|------|-------------|
| N001 | C008 | 1.3951 (14) | C006 | C00D | 1.4142 (17) |
| N001 | C009 | 1.2765 (15) | C007 | C008 | 1.3703 (17) |
| N002 | C006 | 1.3691 (16) | C007 | C00G | 1.4433 (17) |
| N002 | C00C | 1.3167 (16) | C008 | C00F | 1.4311 (17) |
| N003 | C007 | 1.3339 (15) | C00A | C00C | 1.3958 (17) |
| C004 | C005 | 1.4289 (16) | N00B | C00F | 1.1438 (16) |
| C004 | C006 | 1.4194 (16) | C00D | C00I | 1.355 (2)   |
| C004 | C00E | 1.4149 (17) | C00E | C00J | 1.3638 (18) |
| C005 | C009 | 1.4701 (16) | C00G | N00H | 1.1381 (16) |
| C005 | C00A | 1.3656 (17) | C00I | C00J | 1.3974 (19) |

TableS2. Bond Angles for L

| Atom | Atom | Atom | Angle/°     | Atom | Atom | Atom | Angle/°     |
|------|------|------|-------------|------|------|------|-------------|
| C009 | N001 | C008 | 121.37 (10) | C008 | C007 | C00G | 118.67 (11) |
| C00C | N002 | C006 | 117.37 (10) | N001 | C008 | C00F | 121.22 (10) |
| C006 | C004 | C005 | 117.32 (11) | C007 | C008 | N001 | 117.94 (10) |
| C00E | C004 | C005 | 124.31 (11) | C007 | C008 | C00F | 120.80 (10) |



|      |      |      |             |      |      |      |             |
|------|------|------|-------------|------|------|------|-------------|
| C00E | C004 | C006 | 118.36 (11) | N001 | C009 | C005 | 119.70 (11) |
| C004 | C005 | C009 | 122.43 (10) | C005 | C00A | C00C | 120.28 (11) |
| C00A | C005 | C004 | 118.19 (10) | N002 | C00C | C00A | 123.94 (12) |
| C00A | C005 | C009 | 119.31 (11) | C00I | C00D | C006 | 120.36 (12) |
| N002 | C006 | C004 | 122.88 (10) | C00J | C00E | C004 | 120.35 (12) |
| N002 | C006 | C00D | 117.70 (11) | N00B | C00F | C008 | 174.93 (13) |
| C00D | C006 | C004 | 119.42 (11) | N00H | C00G | C007 | 178.94 (15) |
| N003 | C007 | C008 | 125.25 (11) | C00D | C00I | C00J | 120.51 (12) |
| N003 | C007 | C00G | 116.07 (11) | C00E | C00J | C00I | 120.94 (13) |

## References

1. M.J. Frisch, G.W. Trucks, H.B. Schlegel, G.E. Scuseria, M.A. Robb, J.R. Cheeseman, G. Scalmani, V. Barone, B. Mennucci, G.A. Petersson, H. Nakatsuji, M. Caricato, X. Li, H.P. Hratchian, A.F. Izmaylov, J. Bloino, G. Zheng, J.L. Sonnenberg, M. Hada, M. Ehara, K. Toyota, R. Fukuda, J. Hasegawa, M. Ishida, T. Nakajima, Y. Honda, O. Kitao, H. Nakai, T. Vreven, J.A. Montgomery, Jr., J.E. Peralta, F. Ogliaro, M. Bearpark, J.J. Heyd, E. Brothers, K.N. Kudin, V.N. Staroverov, R. Kobayashi, J. Normand, K. Raghavachari, A. Rendell, J.C. Burant, S.S. Iyengar, J. Tomasi, M. Cossi, N. Rega, J.M. Millam, M. Klene, J.E. Knox, J.B. Cross, V. Bakken, C. Adamo, J. Jaramillo, R. Gomperts, R.E. Stratmann, O. Yazyev, A.J. Austin, R. Cammi, C. Pomelli, J.W. Ochterski, R.L. Martin, K. Morokuma, V.G. Zakrzewski, G.A. Voth, P. Salvador, J.J. Dannenberg, S. Dapprich, A.D. Daniels, " O. Farkas, J.B. Foresman, J. V. Ortiz, J. Cioslowski, D.J. Fox, Gaussian 09, Revision C.01, Gaussian Inc., Wallingford, CT (2009).
2. A.D. Becke, *The Journal of Chemical Physics*, 1993, **98(7)**, 5648–5652.
3. S. Sebastian, N. Sundaraganesan, *Spectrochimica Acta Part A: Molecular and Biomolecular Spectroscopy*, 2010, **75(3)**, 941–952.
4. M. Rahimi, A. Amini, H. Behmadi, *Journal of Photochemistry and Photobiology A: Chemistry*, 2020, **388**, 112190.
